# Supplementary material for: Metagenomic Analysis of Lichen Associated Bacterial Community Profiling In Roccella Montagnei
Source: Research Square preprint supplement (doi:10.21203/rs.3.rs-915860/v1), 2021-10-26
Supplement: Supplementary file 1 [file cdb4b1453cf5cb716b3f5dd7.docx]

**Supplementary files**

**Table S1. Metagenomic DNA quantification from the Lichen *Roccella* sp. using Nanodrop.**

| **S. No** | **Sampling code** | **260/280 OD** | **Sample Concentration ng/µl** |
| --- | --- | --- | --- |
| **1.** | **PR** | **1.864** | **15.4** |
| **2.** | **RR** | **1.899** | **25.3** |
| **3.** | **KR** | **1.842** | **16.3** |

**Table S2. Taxonomic composition of Bacterial community in *Roccella montagnei***

| **Samples** | **KR**  ***Cocos nucifera***  **(Coastal)** | **PR**  ***Cocos nucifera***  **(Terrestrial)** | **RR**  ***Maba buxifolia***  **(Coastal)** |
| --- | --- | --- | --- |
| **Kingdom** | **3** | **2** | **3** |
| **Phylum** | **12** | **10** | **9** |
| **Class** | **19** | **17** | **17** |
| **Order** | **34** | **30** | **32** |
| **Family** | **67** | **65** | **63** |
| **Genus** | **81** | **73** | **73** |
| **Species** | **34** | **30** | **28** |

**Table S3. The bacterial diversity and abundance indices in *Roccella montagnei*: chao1, Shannon diversity index, and ACE and Simpson index with goods coverage**

| **Lichen Sample** | **Bacterial Diversity indices** | | | | |
| --- | --- | --- | --- | --- | --- |
| **Ace** | **Chao1** | **Shannon** | **Simpson** | **Goods Coverage** |
| **KR**  **Nagercoil lichen from *Cocos nucifera* (Coastal)** | 345.693 | 352.792 | 4.75 | 0.923 | 1 |
| **PR**  **Pollachi lichen from *Cocos nucifera* (Terrestrial)** | 297.672 | 297.6 | 4.12 | 0.884 | 1 |
| **RR**  **Vedaranyam lichen from *Maba buxifolia* (Coastal)** | 335.302 | 331.906 | 4.515 | 0.909 | 1 |
